# Supplementary material for: Accelerated calciprotein crystallization time (T50) is correlated with impaired lung diffusion capacity in systemic sclerosis
Source: PubMed Central journal article supplement (PMC11466802; doi:10.3389/fimmu.2024.1425885), 2024-09-27
Supplement: Table1.pdf [file Table1.pdf]

**Accelerated calcein crystallization time (T50) is correlated with impaired lung diffusion capacity in systemic sclerosis**

**Supplementary material**

## Supplemental tables

### Suppl. Table S1: Patient characteristics

N numbers of SSc patients with documented characteristics and relevant medications.

|                          | patients/total |
|--------------------------|----------------|
| PAH                      | 14/78          |
| Lung fibrosis            | 27/78          |
| Dysphagy                 | 39/78          |
| Reflux                   | 38/77          |
| Raynaud                  | 77/78          |
| Digital ulcers           | 15/78          |
| Sicca                    | 33/74          |
| <br>                     |                |
| Prednisolone             | 9/78           |
| Mycophenolate mofetil    | 10/78          |
| Tacrolimus               | 1/78           |
| Ebetrexat                | 21/78          |
| Ambrisentan              | 1/78           |
| Macitentan               | 14/78          |
| Sildenafil               | 7/78           |
| Tadalafil                | 1/78           |
| Bosentan                 | 15/78          |
| Treprostinil             | 3/78           |
| Proton pump inhibitors   | 57/78          |
| Calcium and/or Vitamin D | 57/78          |

(PAH - pulmonary arterial hypertension)

## Suppl. Table S2: Characteristics of control group

N numbers of control patients included in the study by reason for visits at the outpatient dermatology clinic.

|                                           | N  |
|-------------------------------------------|----|
| allergy                                   | 17 |
| basalioma                                 | 14 |
| alopecia                                  | 1  |
| eczema                                    | 1  |
| drug-induced intolerance                  | 1  |
| lipoma                                    | 1  |
| psoriasis vulgaris                        | 1  |
| raynaud                                   | 1  |
| scar                                      | 1  |
| St.p. Anaphylaxis                         | 1  |
| St.p. Exanthema                           | 1  |
| St.p. Urticaria                           | 1  |
| St.p. Urticaria, St.p. Prostata Carcinoma | 1  |
| unclear gi symptoms                       | 1  |
| chronic urticaria                         | 1  |

### Suppl. Table S3: Associations of mRSS at baseline

Factors at baseline associated with modified Rodnan skin score (mRSS, 0-51, n=67, change in F p=0.044) in patients with SSc in a linear regression model, shown with regression coefficients (beta) and levels of significance (p value; bolded if p < 0.05).

| mRSS [0-51]                       | beta          | p            |
|-----------------------------------|---------------|--------------|
| <b>Calcium [mmol]</b>             | <b>-0.350</b> | <b>0.006</b> |
| Phosphate [mmol]                  | 0.189         | 0.131        |
| eGFR [ml/min/1.73m <sup>2</sup> ] | -0.120        | 0.402        |
| Disease duration [yrs]            | 0.026         | 0.833        |
| Body weight [kg]                  | -0.185        | 0.254        |
| Body size [cm]                    | -0.180        | 0.311        |
| Sex [m0/f1]                       | -0.256        | 0.111        |
| Age [yrs]                         | -0.014        | 0.929        |
| T50 [min]                         | 0.029         | 0.862        |
| CPP2 radius [nm]                  | 0.137         | 0.406        |

### Suppl. table S4: Associations of mRSS at follow-up

Factors at follow-up associated with modified Rodnan skin score (mRSS, 0-51, n=46, change in F p=0.018) in patients with systemic sclerosis in a linear regression model, shown with regression coefficients (beta) and levels of significance (p value; bolded if p < 0.05).

### Suppl. table S4

| mRSS [0-51]                       | beta          | p            |
|-----------------------------------|---------------|--------------|
| Calcium [mmol]                    | -0.127        | 0.428        |
| Phosphate [mmol]                  | 0.169         | 0.302        |
| eGFR [ml/min/1.73m <sup>2</sup> ] | -0.057        | 0.734        |
| Disease duration [yrs]            | 0.098         | 0.476        |
| Body weight [kg]                  | -0.272        | 0.130        |
| Body size [cm]                    | -0.226        | 0.279        |
| <b>Sex [m0/f1]</b>                | <b>-0.617</b> | <b>0.001</b> |
| Age [yrs]                         | -0.026        | 0.884        |
| T50 [min]                         | -0.217        | 0.181        |
| CPP2 radius [nm]                  | 0.100         | 0.483        |
